# Supplementary material
Source: HighWire-hosted journal article supplement (https://jnm.snmjournals.org/highwire/filestream/94103/field_highwire_adjunct_files/0/72124_Supplemental_Figures.pdf)
Supplement: 72124_Supplemental_Figures.pdf [file 72124_Supplemental_Figures.pdf]

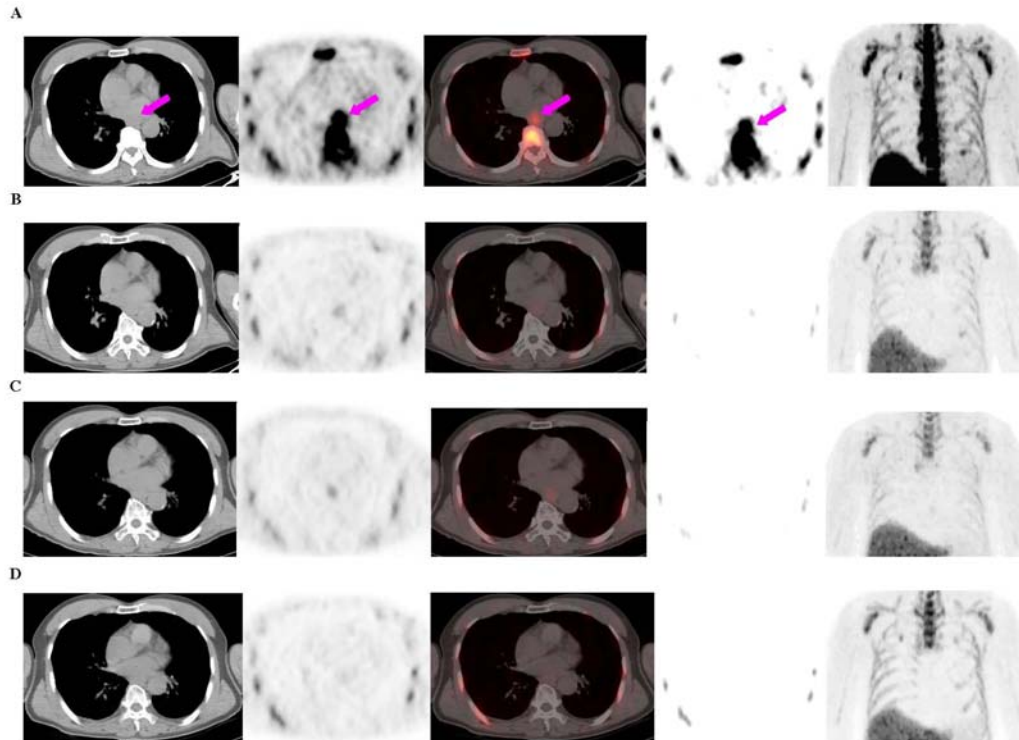

**Suppl. Figure 1:** Typical response of tumor to RT. Columns from left to right show CT, PET, fused PET/CT, PET with a threshold SUV>1.4, and maximum intensity projection images. Pink arrows indicate esophageal tumor. (A) Prior to radiotherapy, SUVmax=15.2, pTV=34.8cm<sup>3</sup>. (B) At 30Gy/15 fractions, SUVmax=2.4, pTV=0.5 cm<sup>3</sup>. (C) At 40Gy/20 fractions, SUVmax=1.8, pTV=0.4 cm<sup>3</sup>. (D) At 50Gy/25 fractions, SUVmax=1.2, pTV=0 cm<sup>3</sup>. Abbreviation: pTV=proliferation target volume

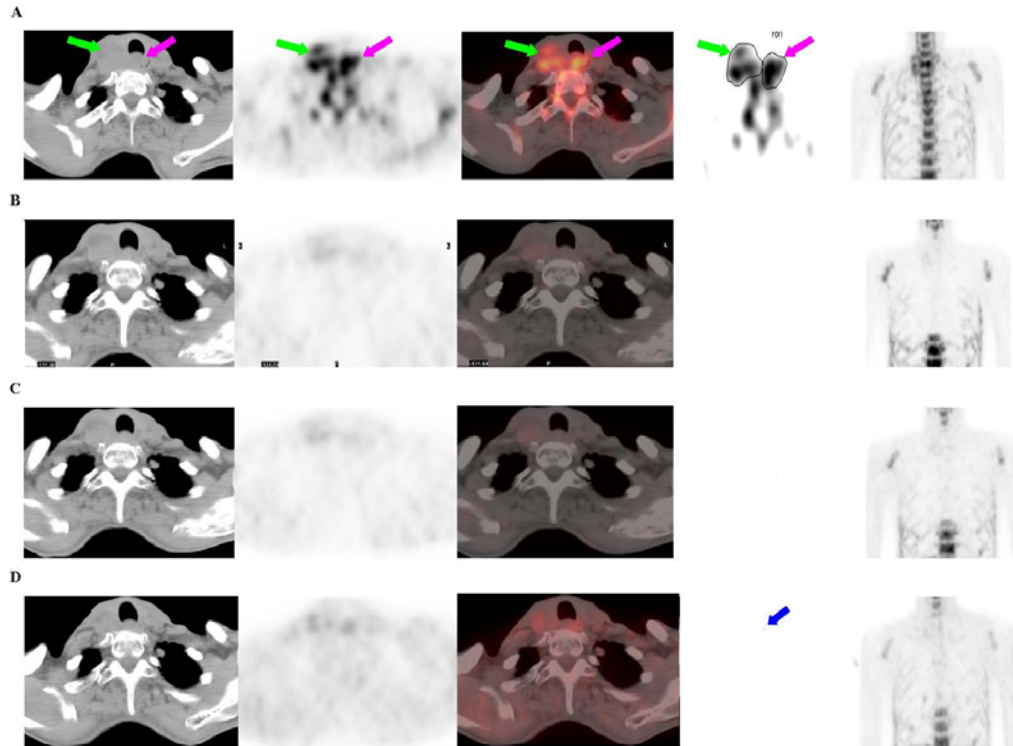

**Suppl. Figure 2:** Tumor repopulation following interruption in treatment. Columns from left to right show CT, PET, fused PET/CT, PET with a threshold  $SUV > 1.4$ , and maximum intensity projection images. Pink arrows indicate esophageal tumor and green arrows show lymph node metastases (A) Prior to radiotherapy,  $SUV_{max} = 5.7$ ,  $pTV = 12.5 \text{ cm}^3$ . (B) At 30Gy/15 fractions,  $SUV_{max} = 1.26$ ,  $pTV = 0$ . (C) At 40Gy/20 fractions,  $SUV_{max} = 1.16$ ,  $pTV = 0$ . (D) At 46Gy/23 fractions, following a treatment break,  $SUV_{max} = 1.82$  (blue arrow),  $pTV = 0.57 \text{ cm}^3$ . Abbreviation:  $pTV = \text{proliferation target volume}$
